# Supplementary material
Source: ML conference proceedings conference paper supplement (https://proceedings.mlr.press/v139/sun21b.html)
Supplement: Supplementary file 1 [file sun21b-supp.pdf]

---

## Appendix for ‘What Makes for End-to-End Object Detection?’

---

### 1. Proof for Theoretical Analysis

We focus on analyzing properties using linear classifier. Let  $\mathcal{X} = \{x \in \mathbb{R}^d : \|x\| \leq 1\}$  be an instance space and  $\mathcal{Y} = \{+1, -1\}$  be the label space. The label of a positive sample is  $+1$  while that of a negative sample is  $-1$ . We wish to train a classifier  $h$ , coming from a hypothesis class  $\mathcal{H} = \{x \mapsto \text{sign}(w^\top x) : w \in \mathbb{R}^d\}$ . Note that we can express the bias term  $b$  by rewriting  $w = [\hat{w}, b]^\top$  and  $x = [\hat{x}, 1]^\top$ . We use the perceptron’s update rule with mini-batch size of 1. That is, given the classifier  $w_t \in \mathbb{R}^d$ , the update is only performed on incorrectly classified example  $(x_t, y_t) \in \mathcal{X} \times \mathcal{Y}$  as given by  $w_{t+1} = w_t + \eta y_t x_t$  where  $\eta$  is the stepsize.

**Proposition 4.2 (Feasibility)** *Suppose that the one-to-one assignment is run on a sequence of examples from  $\mathcal{X} \times \mathcal{Y}$ . Given weight vector  $w_t = [\hat{w}_t, b_t]^\top$  at update step  $t$ , there exists  $\gamma_t \in \mathbb{R}$  and  $\delta_t > 0$  such that for all  $(x, y) \in \mathcal{X} \times \mathcal{Y}$  we have  $yw_t^*{}^\top x \geq \delta_t$  with  $w_t^* = [\hat{w}_t, \gamma_t]^\top$ .*

*Proof.* we denote  $x_t^1 = \arg \max_{x \in \mathcal{X}} w_t^\top x$  and  $x_t^2 = \arg \max_{x \in \mathcal{X} \setminus \{x_t^1\}} w_t^\top x$ . We assume  $w_t^1{}^\top x > 0$ , hence we can infer that  $w_t^\top x_t^1 > w_t^\top x_t^2 > 0$ , otherwise the algorithm converges at  $w_t$  because it satisfies that  $w_t^\top x_t^1 > 0$  and  $w_t^\top x \leq 0$  for all  $x \in \mathcal{X} \setminus \{x_t^1\}$ . By one-to-one assignment, the label of  $x_t^1$  is  $y(x_t^1) = +1$  and the labels of the remaining samples in  $\mathcal{X}$  are  $y(x) = -1, x \in \mathcal{X} \setminus \{x_t^1\}$ .

Take  $\gamma_t = -\frac{\hat{w}_t^\top (\hat{x}_1 + \hat{x}_2)}{2}$ , we have

$$\begin{aligned} y(x_t^1)w_t^*{}^\top x_t^1 &= \hat{w}_t^\top \hat{x}_t^1 - \frac{\hat{w}_t^\top (\hat{x}_1 + \hat{x}_2)}{2} \\ &= \frac{\hat{w}_t^\top (\hat{x}_1 - \hat{x}_2)}{2} > 0 \end{aligned} \quad (1)$$

and for all  $x \in \mathcal{X} \setminus \{x_t^1\}$  we have

$$\begin{aligned} y(x)w_t^*{}^\top x &= -1 * (\hat{w}_t^\top \hat{x} - \frac{\hat{w}_t^\top (\hat{x}_1 + \hat{x}_2)}{2}) \\ &\geq \frac{\hat{w}_t^\top (\hat{x}_1 - \hat{x}_2)}{2} > 0 \end{aligned} \quad (2)$$

where the first inequality holds by  $w_t^\top x \leq w_t^\top x_t^2$  since  $x_t^2 = \arg \max_{x \in \mathcal{X} \setminus \{x_t^1\}} w_t^\top x$ .

By Eqn.(1) and Eqn.(2), we can take  $\delta_t = \frac{\hat{w}_t^\top (\hat{x}_1 - \hat{x}_2)}{2}$ .

**Theorem 4.3 (Convergence)** *Let  $\gamma_{t+1}$  and  $\gamma_t$  be the constants defined in Proposition 4.2. For each update step  $t$ , we assume there exists a stepsize  $\eta_t$  such that  $\|x_t\|^2 \eta_t^2 + y_t(\gamma_{t+1} - 2\gamma_t)\eta_t + b_t(\gamma_{t+1} - \gamma_t) > 0$  where  $(x_t, y_t)$  be the incorrectly classified sample at iteration  $t$ .*

*If the sample label is assigned by one-to-one assignment, then,  $t \leq \frac{\eta_{max}^2 - 2\eta_{min} \delta_{min} (w_1^\top w_0^* - \|w_0\| - \eta_{max})}{2\eta_{min}^2 \delta_{min}^2}$  where  $\eta_{max}$  and  $\eta_{min}$  are the maximum and minimum value of stepsize among all  $t$ ’s updates,  $w_1$  is the classifier after the first update and  $\delta_{min}$  is the minimum of all  $\delta_t$ s in Proposition 4.2. All instances at initialization can be correctly classified by  $w_0^*$ .*

We first show  $w_{t+1}^\top w_{t+1}^* \geq w_{t+1}^\top w_t^*$ . Rewriting the weight vector  $w_t$  into a normal vector and a bias gives us

$$\begin{bmatrix} \hat{w}_{t+1} \\ b_{t+1} \end{bmatrix} = \begin{bmatrix} \hat{w}_t \\ b_t \end{bmatrix} + \eta y_t \begin{bmatrix} \hat{x}_t \\ 1 \end{bmatrix} \quad (3)$$

From Eqn.(3), we have  $w_{t+1} = [\hat{w}_t + \eta y_t \hat{x}_t, b_t + \eta y_t]^\top$  at update  $t$ . According to the definition of  $\gamma_t$  and  $\gamma_{t+1}$ , we obtain  $w_{t+1}^* = [\hat{w}_t + y_t \hat{x}_t, \gamma_{t+1}]$  and  $w_t^* = [\hat{w}_t, \gamma_t]$ . Therefore, we can derive that

$$\begin{aligned} w_{t+1}^\top w_{t+1}^* - w_{t+1}^\top w_t^* &= (\hat{w}_t + \eta y_t \hat{x}_t)^\top \eta y_t \hat{x}_t + (b_t + \eta y_t)(\gamma_{t+1} - \gamma_t) \\ &= \|x_t\|^2 \eta^2 + y_t(\hat{w}_t^\top \hat{x}_t - \gamma_t + \gamma_{t+1})\eta + b_t(\gamma_{t+1} - \gamma_t) \\ &\geq \|x_t\|^2 \eta^2 + y_t(\gamma_{t+1} - 2\gamma_t)\eta + b_t(\gamma_{t+1} - \gamma_t) \end{aligned} \quad (4)$$

Taking  $\eta = \eta_t$  gives us  $w_{t+1}^\top w_{t+1}^* \geq w_{t+1}^\top w_t^*$  by the assumption. Note that the assumption in Theorem 4.3 easily holds when  $\eta_t$  is a large but finite number due to the property of quadratic equation of one variable in Eqn.(4).

To proceed, we find upper and lower bounds on the length of the weight vector  $w_t$  to show finite number of updates. By convenience, we normalize  $w_t^*$  to  $\|w_t^*\| = 1$ . Assume that after  $t + 1$  steps the weight vector  $w_{t+1}$  has been computed. This means that at time  $t$  a training sample was incorrectly classified by the weight vector  $w_t$  and so  $w_{t+1} = w_t + \eta_t y_t x_t$ . By one-to-one assignment, we have  $y_t = 1$  if  $x_t = \arg \max_{x \in \mathcal{X}} w_t^\top x$  and  $-1$  otherwise.

By computing the length of  $w_{t+1}$ , we arrive at

$$\begin{aligned} \|w_{t+1}\|^2 &= (w_t + \eta_t y_t x_t)^\top (w_t + \eta_t y_t x_t) \\ &= \|w_t\|^2 + \|x_t\|^2 \eta_t^2 + 2y_t w_t^\top x_t \eta_t \\ &\leq \|w_t\|^2 + \eta_t^2 \end{aligned} \quad (5)$$

where the third equation holds because the length of instance  $x$  is bounded by 1 and  $y_t w_t^\top x_t$  is negative or zero (otherwise we would have not corrected  $w_t$  using sample

$(x_t, y_t)$  by perceptron’s update rule) . Induction through Eqn.(5) then gives us

$$\|w_{t+1}\|^2 \leq \|w_0\|^2 + \sum_{k=0}^t \eta_k^2 \leq (t+1)\eta_{max}^2 \quad (6)$$

where  $\eta_{min} = \max\{\eta_k : k = 0, 1, \dots, t\}$ . To drive the lower bound, we multiply  $w_t^*$  in Proposition 4.2 on both sides of  $w_{t+1} = w_t + \eta_t y_t x_t$ , it gives us  $w_{t+1}^\top w_t^* = w_t^\top w_t^* + \eta_t y_t w_t^{*\top} x_t$ . By Eqn.(4), it can be relaxed into

$$\begin{aligned} w_{t+1}^\top w_t^* &= w_t^\top (w_t^* - w_{t-1}^* + w_{t-1}^*) + \eta_t y_t w_t^{*\top} x_t \\ &= w_t^\top w_{t-1}^* + w_t^\top (w_t^* - w_{t-1}^*) + \eta_t y_t w_t^{*\top} x_t \\ &\geq w_t^\top w_{t-1}^* + \eta_t y_t w_t^{*\top} x_t \\ &\geq w_t^\top w_{t-1}^* + \eta_t \delta_t \end{aligned} \quad (7)$$

where the first inequality holds by Eqn.(4), the second inequality holds by Proposition 4.2. Induction through Eqn.(7) then yields

$$w_{t+1}^\top w_t^* \geq w_1^\top w_0^* + \sum_{k=1}^t \eta_k \delta_k \geq w_1^\top w_0^* + t\eta_{min}\delta_{min} \quad (8)$$

where  $\delta_{min} = \min\{\delta_k : k = 1, \dots, t\}$  and  $\eta_{min} = \min\{\eta_k : k = 1, \dots, t\}$ . Combining Eqn.(6) and Eqn.(8), we obtain that

$$w_1^\top w_0^* + t\eta_{min}\delta_{min} \leq \sqrt{\|w_0\|^2 + (t+1)\eta_{max}^2} \quad (9)$$

Using  $\sqrt{a+b} \leq \sqrt{a} + \sqrt{b}$ , the above implies that

$$w_1^\top w_0^* + t\eta_{min}\delta_{min} \leq \|w_0\| + \sqrt{t}\eta_{max} + \eta_{max} \quad (10)$$

Using standard algebraic manipulations, the above implies that

$$\begin{aligned} t &\leq \frac{(\eta_{max} + \sqrt{\eta_{max}^2 - 4\eta_{min}\delta_{min}(w_1^\top w_0^* - \|w_0\| - \eta_{max})})^2}{2\eta_{min}\delta_{min}} \\ &\leq \frac{\eta_{max}^2 - 2\eta_{min}\delta_{min}(w_1^\top w_0^* - \|w_0\| - \eta_{max})}{2\eta_{min}^2\delta_{min}^2} \end{aligned} \quad (11)$$

This completes the proof.

## 2. Positive Samples for Multiple Objects

As discussed in Section 4, when there exists an object in the image, classification cost results in a clear score gap between the sample of the first-highest score and the sample of the second-highest score. In Figure 1, we show positive sample for multiple objects. Classification cost produces two clusters of samples, one of which is composed of positive samples, and their scores are obviously higher than samples in another cluster.

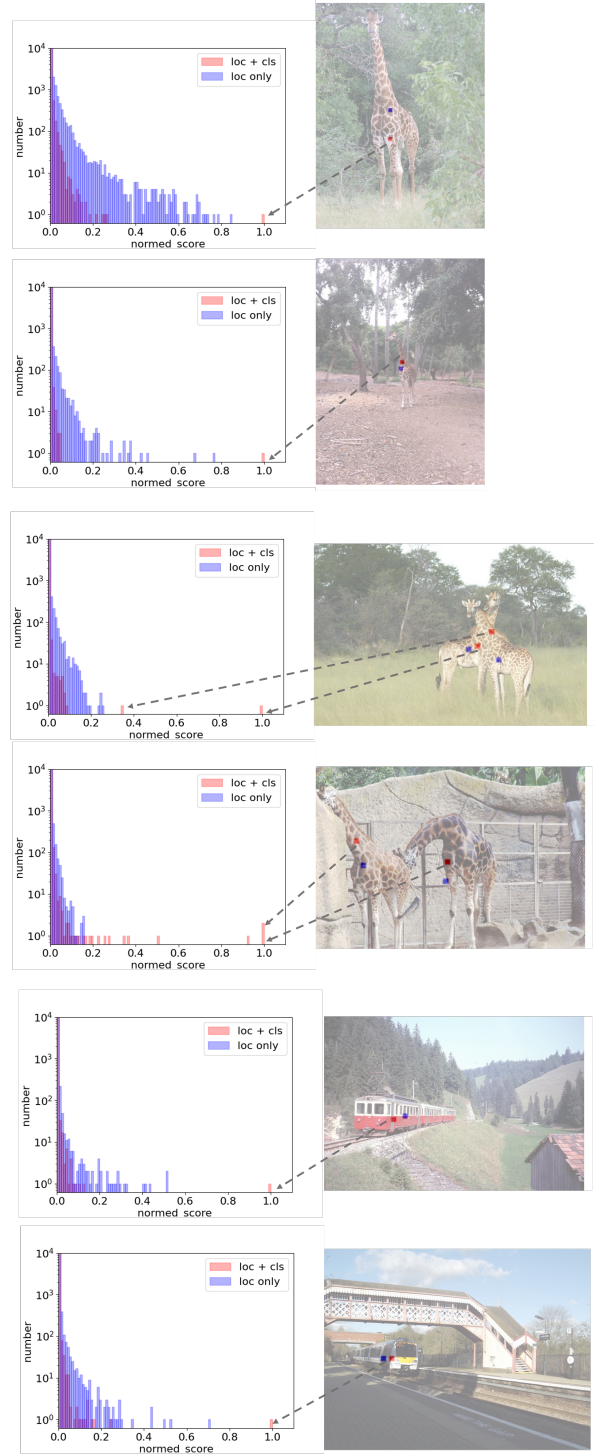

**Figure 1. Positive samples in different training images.** For better visualization, we only show the part below the number of  $10^4$ , and scores are normalized to  $[0, 1]$ . Blue bins show the detector trained with positive samples chosen by only location cost. Red bins consider both location cost and classification cost. For multiple objects, classification cost produces two clusters of samples, the scores of positive sample cluster are obviously higher than samples in negative sample cluster.
